# Supplementary material for: Modulating trans-imination and hydrogenation towards the highly selective production of primary diamines from dialdehydes
Source: Royal Society of Chemistry journal article supplement (doi:10.1039/d0gc02280b), 2020-01-01
Supplement: d0gc02280b1.pdf [file d0gc02280b1.pdf]

Electronic Supplementary Material (ESI) for Green Chemistry.  
This journal is © The Royal Society of Chemistry 2020

---

*Electronic Supplementary Information (ESI) for*

## **Modulating trans-amination and hydrogenation towards the highly selective production of primary diamines from dialdehydes**

Haifeng Qi,<sup>a,b</sup> Fei Liu,<sup>\*a</sup> Leilei Zhang,<sup>a</sup> Lin Li,<sup>a</sup> Yang Su,<sup>a</sup> Jingyi Yang,<sup>a,b</sup> Rui Hao,<sup>a</sup> Aiqin Wang<sup>\*a,c</sup> and Tao Zhang,<sup>a,c</sup>

---

<sup>a</sup> CAS Key Laboratory of Science and Technology on Applied Catalysis, Dalian Institute of Chemical Physics, Chinese Academy of Sciences, Dalian 116023 (China), Email: aqwang@dicp.ac.cn; fei.liu@dicp.ac.cn.

<sup>b</sup> University of Chinese Academy of Sciences, Beijing 100049 (China).

<sup>c</sup> State Key Laboratory of Catalysis, Dalian Institute of Chemical Physics, Chinese Academy of Sciences, Dalian 116023 (China).

## Experimental Procedures

### Methods

**Catalyst preparation.** All catalysts were prepared by incipient wetness impregnation. As an example, for the preparation of Co/ZrO<sub>2</sub> catalyst, 209 mg Co(OAc)<sub>2</sub>·4H<sub>2</sub>O was added to 1.5 g water and sonicated for 10 min, followed by addition of 1 g ZrO<sub>2</sub>. Then the mixture was evaporated to dryness at 333 K. The obtained solid was ground to powder and then transferred to a quartz boat in the tube furnace and fluxed with air for 30 min. The tube furnace was then heated to 673 K in air atmosphere at a ramp of 5 K/min and was held at that temperature for 2 h. After cooling to room temperature, the gas was switched to hydrogen atmosphere and the tube was fluxed with hydrogen for 30 min. The tube furnace was then heated to 623 K in hydrogen atmosphere at a ramp of 2 K/min and was held at that temperature for 2 h. After being cooled to room temperature, the catalyst was passivated with 1 % (v/v) O<sub>2</sub>/N<sub>2</sub> for 4 h at room temperature. The other ZrO<sub>2</sub>-supported metal catalysts were prepared with the similar procedure, except that the metal precursors were changed to the corresponding metal salts and the reduction temperature was adjusted to the suitable temperature (For Ni, Cu, Ru, Pd, Pt, Ir and Rh, the reduction temperature were 623 K, 673 K, 523 K, 523 K, 523 K, 573 K and 573 K, respectively).

**Reaction tests.** In the typical reaction for reductive amination of dialdehydes, 0.25 mmol 2,5-diformylfuran (DFF) (Bidepharm), 0.75 mmol butylamine, 30 mg catalyst, and 3 g methanol were put into an autoclave (Parr reactor with a volume of 50 mL). The autoclave was purged with NH<sub>3</sub> for three times, and charged with 0.6 MPa NH<sub>3</sub> and 2 MPa H<sub>2</sub> at room temperature. After sealing the autoclave, the reaction mixture was stirred at a rate of 800 r/min and heated at 373 K for 10 h with continuous stirring. After the reaction, the liquid-phase products were analyzed with a GC system (Agilent 7890A) equipped with a HP-5 column (30 m × 0.25 μm × 0.25 mm i.d) and a FID detector by using dodecane as an internal standard.

The conversion of DFF ( $X_{\text{DFF}}$ ) and the yield of BAMF ( $Y_{\text{BAMF}}$ ) were calculated using the following equations:

$$X_{\text{DFF}} (\%) = (\text{mol}_{\text{DFF consumed}}) / (\text{mol}_{\text{DFF fed}}) * 100$$

$$Y_{\text{BAMF}} (\%) = (\text{mol}_{\text{BAMF produced}}) / (\text{mol}_{\text{DFF fed}}) * 100$$

**The purification process of 2,5-bis(aminomethyl)furan (BAMF):** After the typical reaction, the Co/ZrO<sub>2</sub> catalyst was removed by centrifugation, and the upper liquid was distilled by rotatory evaporator. Then, 5 ml CH<sub>2</sub>Cl<sub>2</sub> and 5 ml H<sub>2</sub>O were add to the residue, and the BAMF was extracted in H<sub>2</sub>O phase. The pure BAMF solid was obtained by recrystallization.

**H<sub>2</sub>-TPR** was carried out with a Micromeritics AutoChem II 2920 System. 0.10 g of the calcined sample was loaded in a quartz reactor, heated in Ar flow at 573 K for 1 h with a ramp of 10 K/min, and then cooled down to 323 K. The reactor was flushed with 10% H<sub>2</sub>/Ar to reach a stable background. Then the sample was heated to 1073 K at a rate of 10 K/min in 10 vol% H<sub>2</sub>/Ar with a flow rate of 30 mL/min.

**Scanning transmission electron microscopy (STEM) and energy dispersive X-ray spectroscopy (EDS)** experiments were performed on a JEOL JEM-2100F microscope operated at 200 kV, equipped with an Oxford Instruments

ISIS/INCA energy-dispersive X-ray spectroscopy (EDS) system with an Oxford Pentafet Ultrathin Window (UTW) Detector. Before observation, the catalyst sample was ultrasonically dispersed in ethanol and then a drop of the suspension was put onto a copper TEM grid coated with a thin holey carbon film for STEM observation.

**In-situ X-ray diffraction (XRD)** analysis was carried out on a PANalytical X'pert diffractometer using Cu K $\alpha$  radiation source ( $\lambda = 0.15432$  nm) with a scanning angle ( $2\theta$ ) of  $10^\circ$ -  $80^\circ$ , operated at 40 kV and 40 mA. The Co/ZrO<sub>2</sub> catalyst was transferred to the chamber with H<sub>2</sub> flow of 20 mL/min, and the XRD spectra were collected with elevating the temperature.

**H<sub>2</sub> and NH<sub>3</sub>-microcalorimetric measurements** were performed by a BT2.15 heat-flux calorimeter, which was connected to a gas handling and a volumetric system employing MKS Baratron Capacitance Manometers for precision pressure measurement. The ultimate dynamic vacuum of the microcalorimetric system was  $10^{-7}$  Torr. First, the fresh sample was reduced at 623 K for Co/ZrO<sub>2</sub> and 523 K for Pd/ZrO<sub>2</sub> in a special glass cell. After that, the glass cell was placed into the high vacuum system and stabilized for 12 h. And the H<sub>2</sub>-microcalorimetric data and NH<sub>3</sub>-microcalorimetric data were collected by sequentially introducing small doses ( $10^{-6}$  mol) of H<sub>2</sub> and NH<sub>3</sub> into the system until it became saturated (5-6 Torr). The H<sub>2</sub> and NH<sub>3</sub>-microcalorimetric adsorption was conducted under 313 K and 353 K, respectively. Simultaneously, the differential heat versus adsorbate coverage plots and adsorption isothermals can be obtained.

**NMR** spectra were recorded at room temperature in CDCl<sub>3</sub> on 400 MHz Bruker DRX-400 NMR spectrometers.

## Results and Discussion

Figure S1

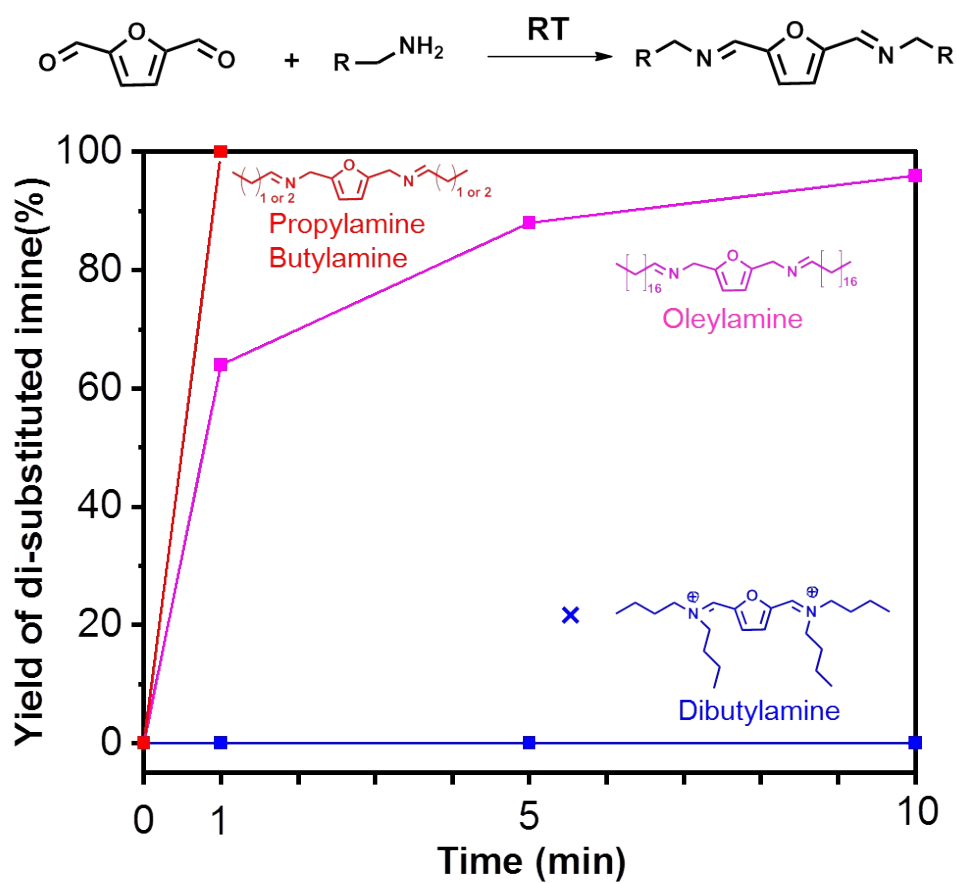

Figure S1. Reactivity of DFF with various alkylamines.

Reaction condition: 0.5 mmol DFF, 1.5 mmol alkylamines, 5 g methanol, room temperature.

Figure S2

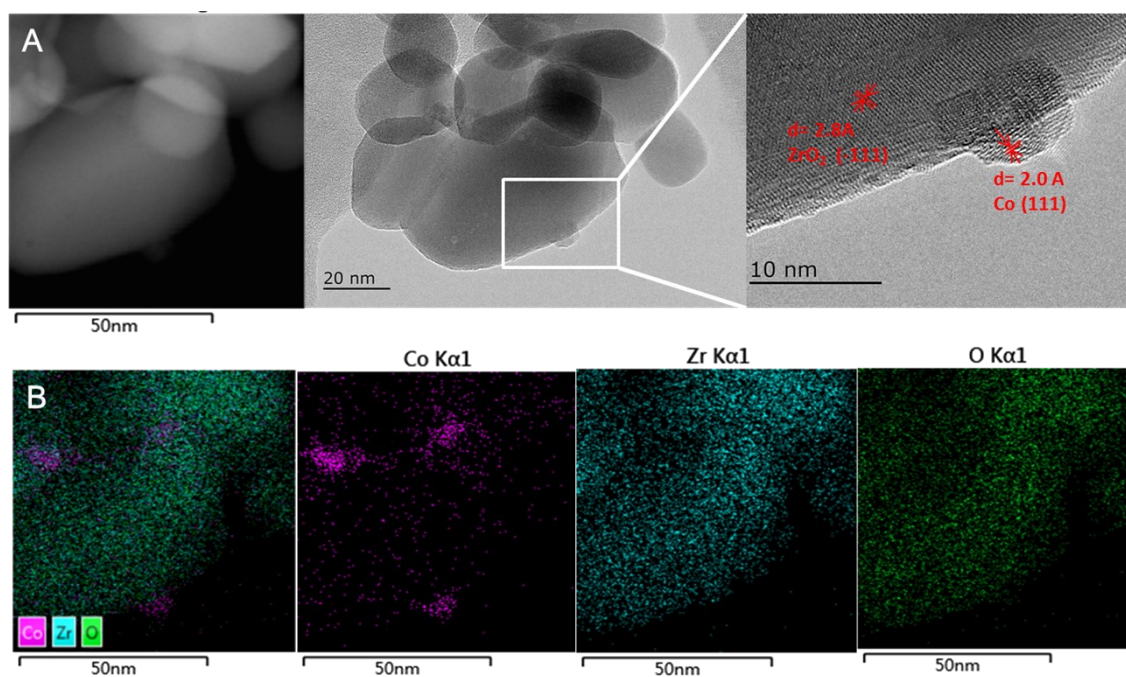

Figure S2. HAADF-STEM (A) and EDS-Mapping (B) of the Co/ZrO<sub>2</sub> catalyst.

Figure S3

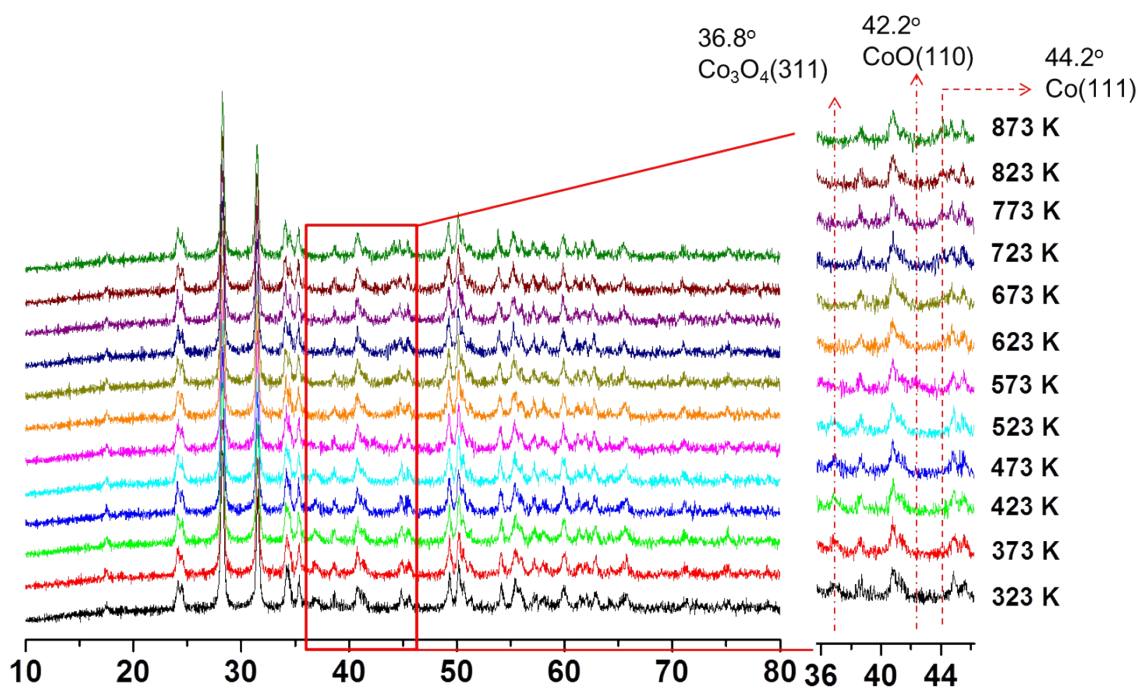

Figure S3. In-situ XRD patterns of Co/ZrO<sub>2</sub> catalyst.

The peak at 36.8° for Co<sub>3</sub>O<sub>4</sub> (311) disappeared at 573 K and above; the peak at 42.2° for CoO (110) appeared only at 573 K, and then disappeared due to transformation into metallic Co<sup>0</sup>.<sup>51</sup>

Figure S4

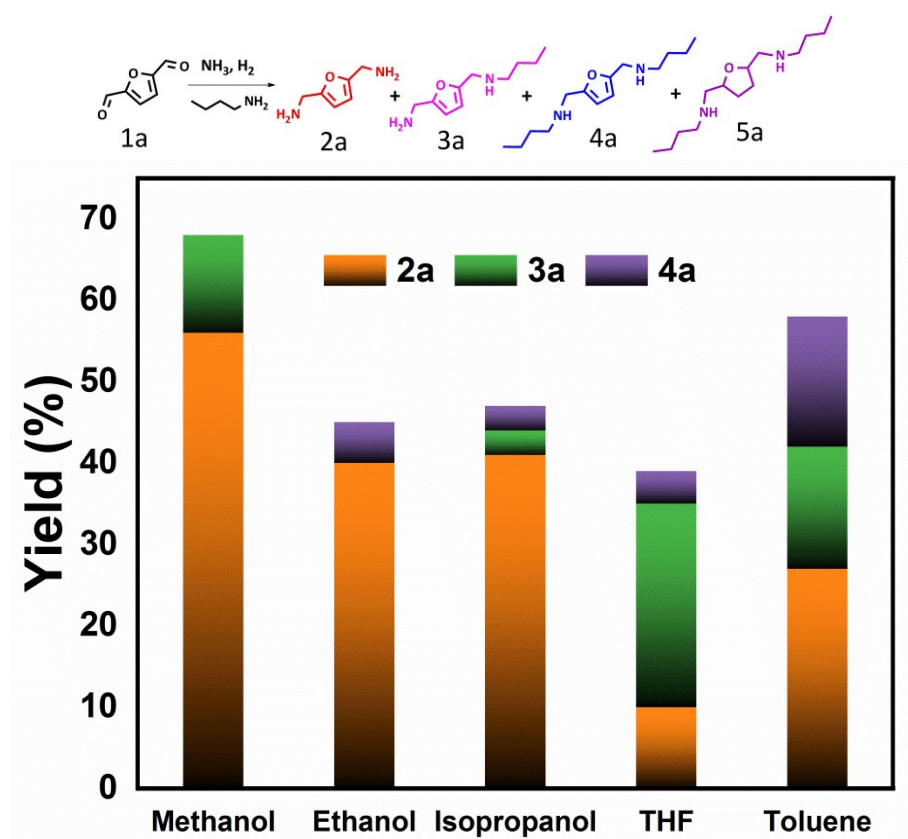

Figure S4. Solvents optimization over the Ru/ZrO<sub>2</sub> catalyst.

Reaction conditions: 30 mg Ru/ZrO<sub>2</sub> catalyst, 0.25 mmol DFF, 0.75 mmol butylamine, 3 g solvent, 0.6 MPa NH<sub>3</sub>, 2 MPa H<sub>2</sub>, 373 K, 10 h, dodecane as internal standard.

**Figure S5**

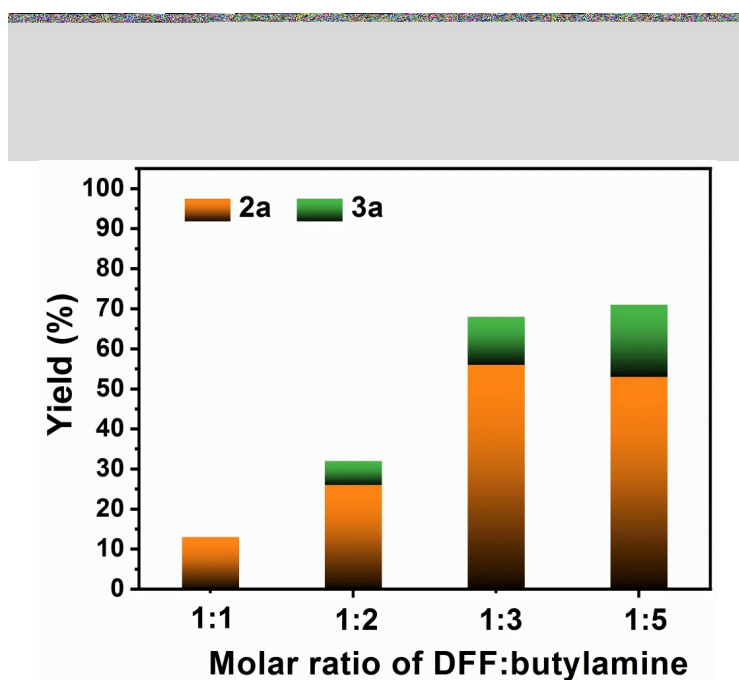

**Figure S5.** The effect of butylamine amount on the product yield over Ru/ZrO<sub>2</sub> catalyst.

Reaction conditions: 30 mg Ru/ZrO<sub>2</sub> catalyst, 0.25 mmol DFF, defined amount of butylamine, 3 g methanol, 0.6 MPa NH<sub>3</sub>, 2 MPa H<sub>2</sub>, 373 K, 10 h, dodecane as internal standard.



Figure S6

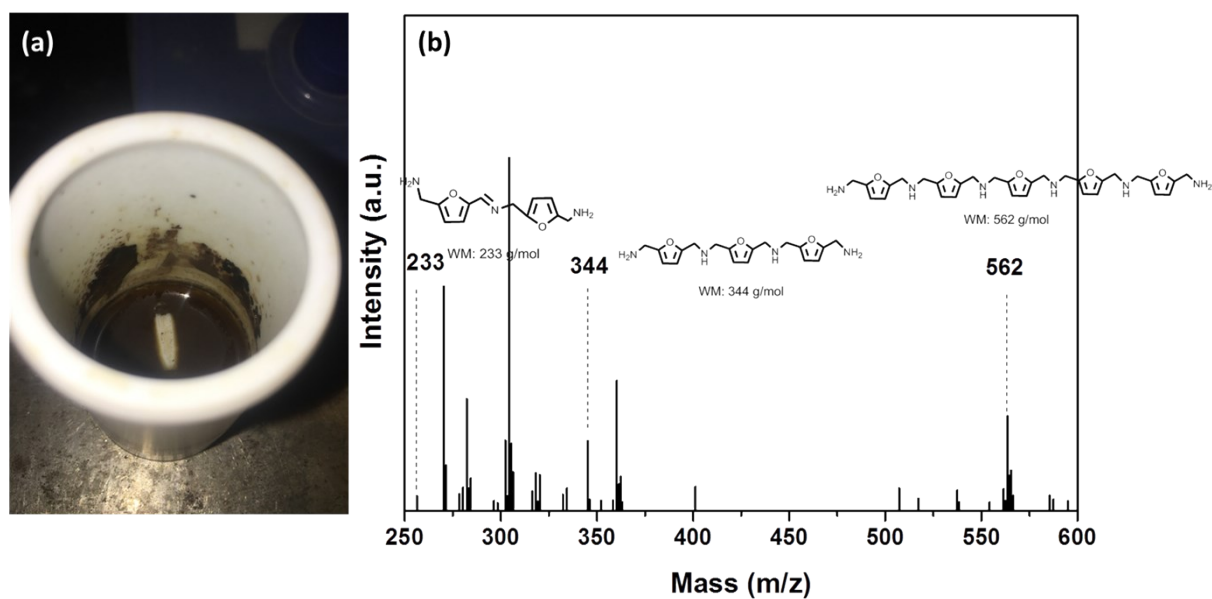

Figure S6. (a) Photograph of reduction amination of DFF over Co/ZrO<sub>2</sub> catalyst in the absence of alkylamine. (b) MALDI-TOF mass spectrum of (a) and the identification of some oligomers ( $m/z = MW + 1$  (H<sup>+</sup>) or  $+ 23$  (Na<sup>+</sup>)).

Figure S7

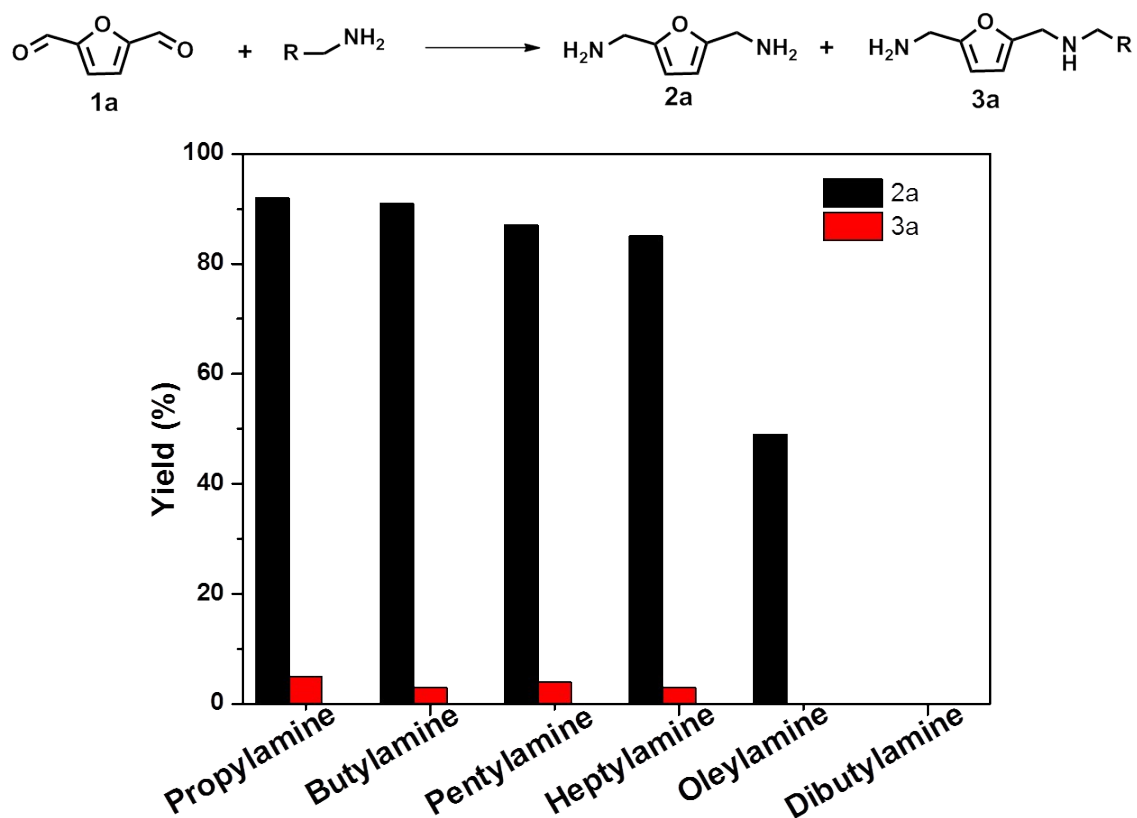

Figure S7. Effect of different alkylamines on the yield of BAMF over Co/ZrO<sub>2</sub> catalyst.

Reaction conditions: 30 mg Co/ZrO<sub>2</sub> catalyst, 0.25 mmol DFF, 0.75 mmol alkylamine, 3 g methanol, 0.6 MPa NH<sub>3</sub>, 2 MPa H<sub>2</sub>, 373 K, 10 h, dodecane as internal standard.

Figure S8

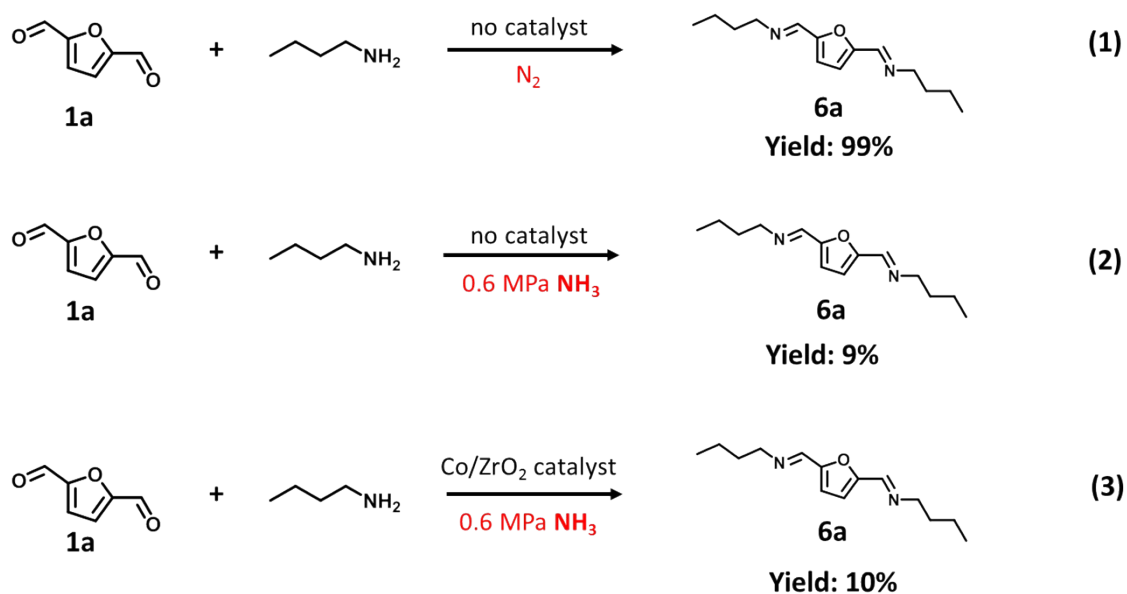

**Figure S8. Reaction of DFF and butylamine under different atmosphere with or without catalyst.**

(1) Without catalyst, 2MPa N<sub>2</sub>; (2) Without catalyst, 0.6 MPa NH<sub>3</sub>, 2 MPa N<sub>2</sub>; (3) 30 mg Co/ZrO<sub>2</sub> catalyst, 0.6 MPa NH<sub>3</sub>; 2 MPa N<sub>2</sub>. Reaction conditions: 0.25 mmol DFF, 0.75 mmol butylamine, 3 g methanol, 373 K, 10 h, dodecane as internal standard.

**Figure S9**

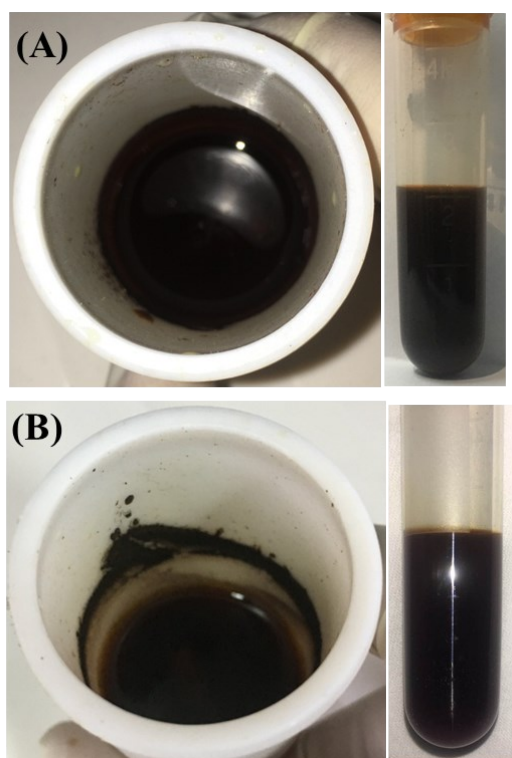

**Figure S9. Photographs of reaction solutions under different conditions.**

(A) Without catalyst, 0.6 MPa  $\text{NH}_3$ , 2 MPa  $\text{N}_2$ ; (B) 30 mg  $\text{Co/ZrO}_2$  catalyst, 0.6 MPa  $\text{NH}_3$ ; 2 MPa  $\text{N}_2$ . (Reaction conditions: 0.25 mmol DFF, 0.75 mmol butylamine, 3 g methanol, 373 K, 10 h, dodecane as internal standard).

Figure S10

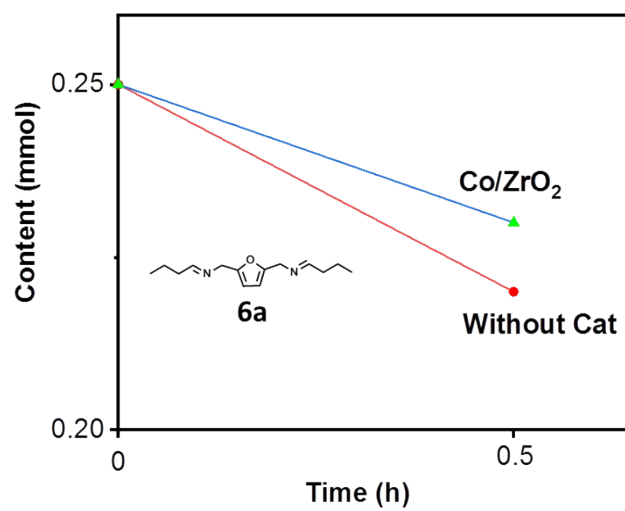

Figure S10. Reaction of 6a with NH<sub>3</sub> with or without catalyst.

Reaction conditions: 30 mg catalyst, 0.25 mmol 6a, 3 g methanol, 0.6 MPa NH<sub>3</sub>, 2 MPa N<sub>2</sub>, 373 K, 0.5 h, dodecane as internal standard.

**Table S1. Differential adsorption heat of H<sub>2</sub> and NH<sub>3</sub> on Co/ZrO<sub>2</sub>, Pd/ZrO<sub>2</sub> and ZrO<sub>2</sub> catalysts.**

| Entry | Catalyst            | H <sub>2</sub> |          | NH <sub>3</sub> |          | H <sub>2</sub> adsorption after pre-adsorption of NH <sub>3</sub> |          |
|-------|---------------------|----------------|----------|-----------------|----------|-------------------------------------------------------------------|----------|
|       |                     | Heat           | Coverage | Heat            | Coverage | Heat                                                              | Coverage |
|       |                     | (kJ/mol)       | (μmol/g) | (kJ/mol)        | (μmol/g) | (kJ/mol)                                                          | (μmol/g) |
| 1     | Co/ZrO <sub>2</sub> | 99.7           | 8.7      | 168.5           | 138.1    | n.d.                                                              | n.d.     |
| 2     | Pd/ZrO <sub>2</sub> | 108.1          | 25.1     | 172.5           | 157.3    | 87.9                                                              | 18.7     |
| 3     | ZrO <sub>2</sub>    | n.d.           | n.d.     | 198.9           | 123.2    | n.d.                                                              | n.d.     |

**Figure S11**

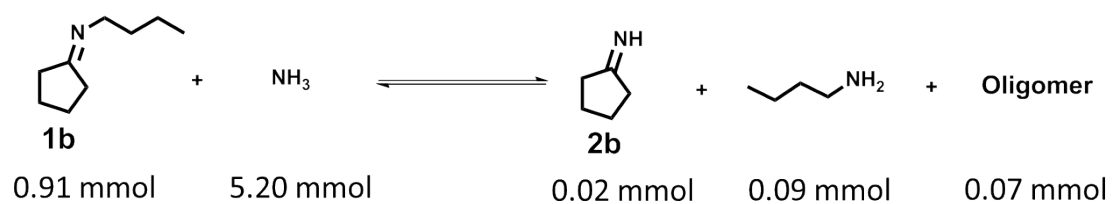

**Figure S11. Trans-amination between secondary imine and  $\text{NH}_3$  over  $\text{Co/ZrO}_2$  catalyst.**

Reaction condition: 1 mmol secondary imine (**1b**), 30 mg  $\text{Co/ZrO}_2$ , 3 g methanol, 0.6 MPa  $\text{NH}_3$ , 2 MPa  $\text{N}_2$ , 100°C, 30min.

**Figure S12**

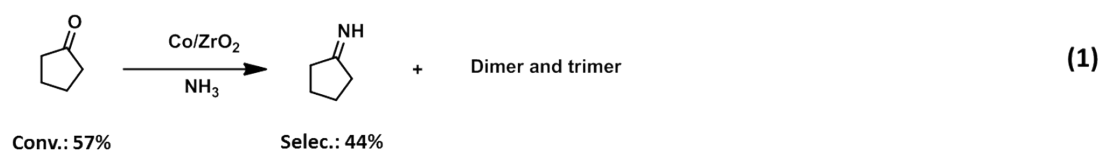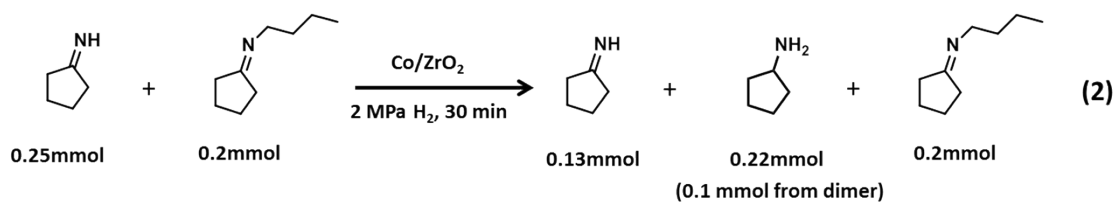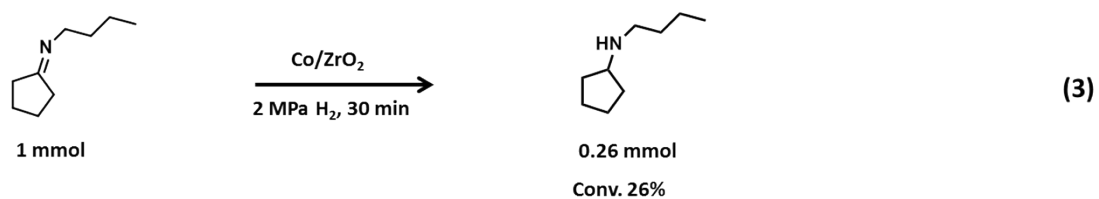

**Figure S12. Competitive hydrogenation of primary and secondary imines over Co/ZrO<sub>2</sub> catalyst.**

Reaction conditions: (1) 1 mmol cyclopentanone, 30 mg Co/ZrO<sub>2</sub>, 3 g methanol, 0.6 MPa NH<sub>3</sub>, 2 MPa N<sub>2</sub>, 373 K, 30min; (2) Add 0.2 mmol secondary imine to the solution after reaction (1), 30 mg Co/ZrO<sub>2</sub>, 2 MPa H<sub>2</sub>, 373 K, 30min; (3) 1 mmol secondary imine, 30 mg Co/ZrO<sub>2</sub>, 3 g methanol, 2 MPa H<sub>2</sub>, 373 K, 30min.



**Figure S13**

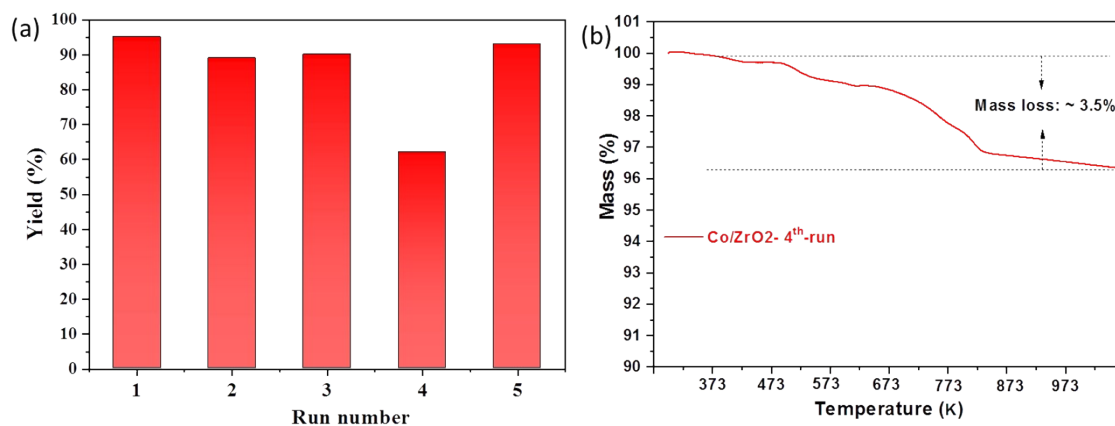

**Figure S13. (a) Reuse test of Co/ZrO<sub>2</sub> catalyst and (b) TG result of used Co/ZrO<sub>2</sub> catalyst after the 4<sup>th</sup> run.**

Reaction conditions: 30 mg Co/ZrO<sub>2</sub> catalyst, 0.25 mmol DFF, 0.75 mmol butylamine, 3 g methanol, 0.6 MPa NH<sub>3</sub>, 2 MPa H<sub>2</sub>, 373 K, 10 h, dodecane as internal standard. After each reaction, the catalyst was recovered by centrifugation and washing three times by ethanol. After the fourth reaction, the catalyst was calcined at 673 K and reduced at 623 K and then submitted to the fifth reaction.

**Table S2. The Reductive amination of 10wt% DFF over Co/ZrO<sub>2</sub> catalyst<sup>a</sup>**

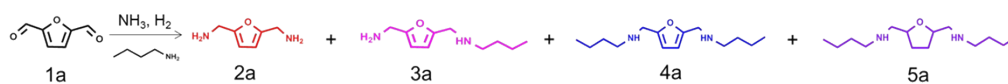

| Entry | Catalyst            | DFF                    | Yield (%) |    |    |      |
|-------|---------------------|------------------------|-----------|----|----|------|
|       |                     | Concentration<br>(wt%) | 2a        | 3a | 4a | 5a   |
| 1     | Co/ZrO <sub>2</sub> | 10                     | 71        | 4  | 16 | n.d. |

<sup>a</sup>Reaction condition: 200 mg Co/ZrO<sub>2</sub> catalyst, 2.5 mmol DFF, 7.5 mmol butylamine, 3 g methanol, 1.5 MPa NH<sub>3</sub>, 4 MPa H<sub>2</sub>, 373 K, 10h, dodecane as internal standard.

**Figure S14**

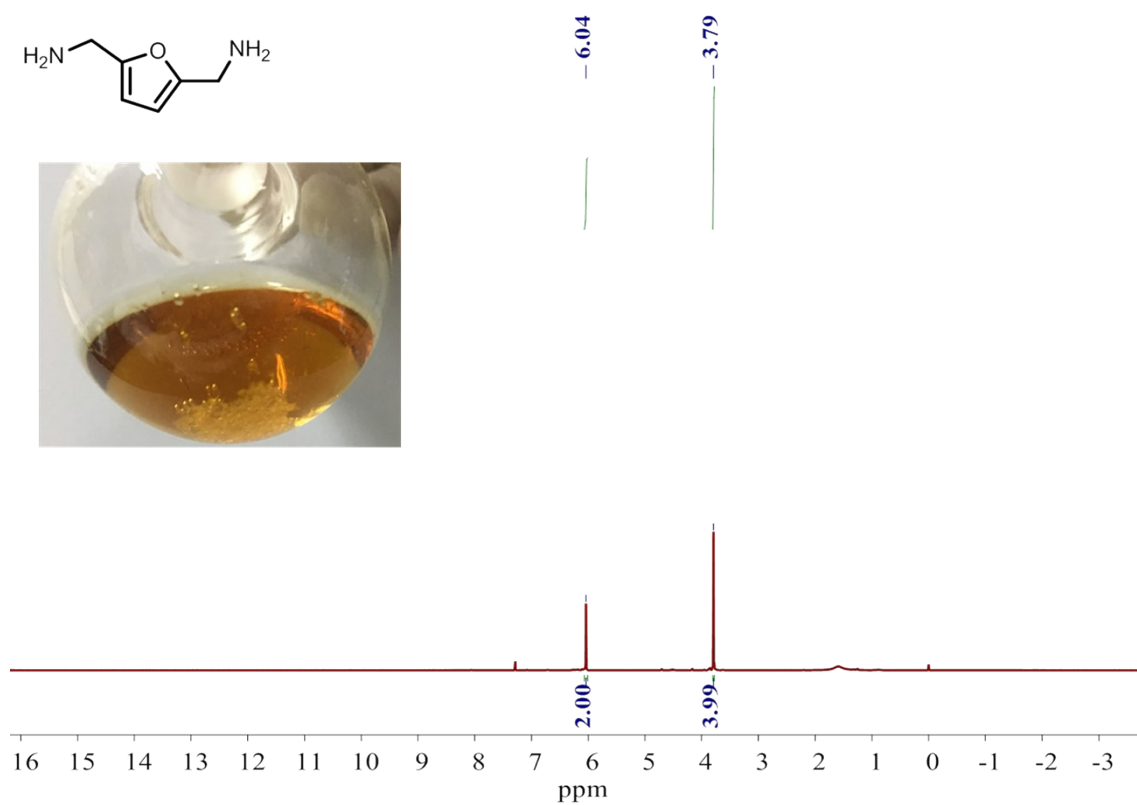

**Figure S14.  $^1\text{H}$  NMR spectrum (CDCl<sub>3</sub>-d, 400 MHz) of isolated BAMF**

**$\delta$ 6.04 (s, 2H, -C=CH-CH=C-), 3.79 (s, 4H, -CH<sub>2</sub>-N)**

Figure S15

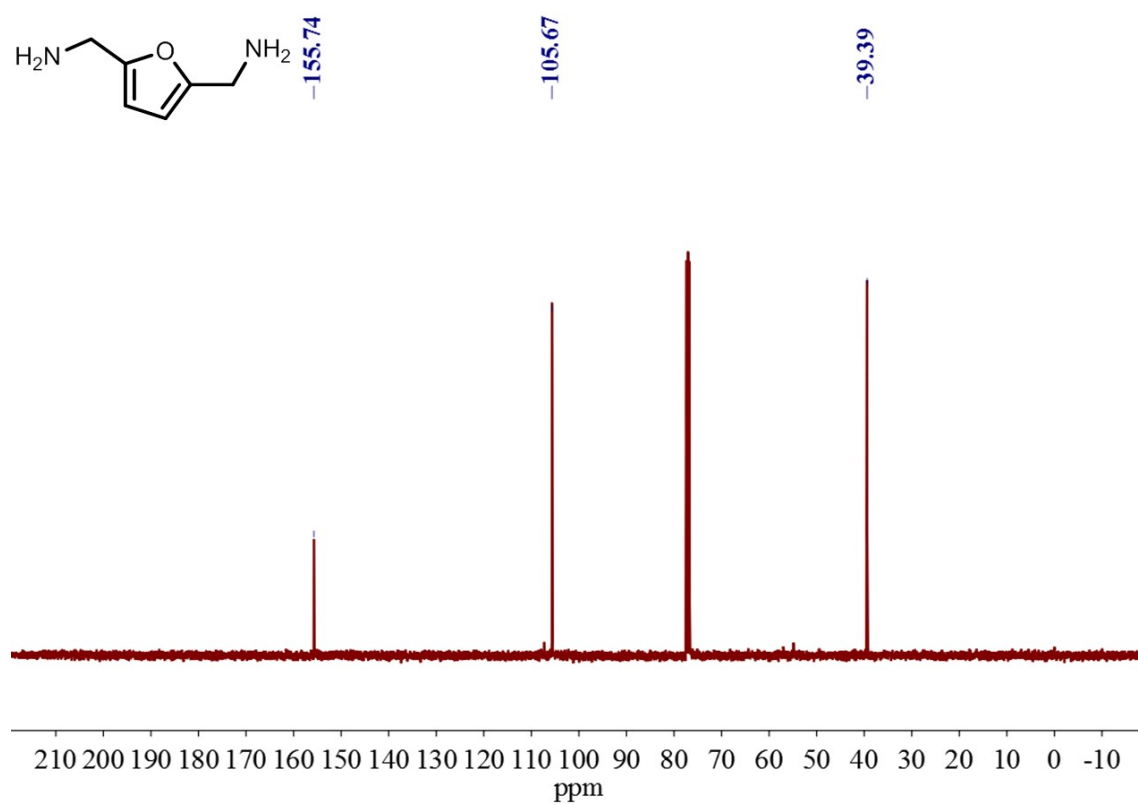

Figure 15.  $^{13}\text{C}$  NMR spectrum ( $\text{CDCl}_3$ -*d*, 101 MHz) of isolated BAMF  
 $\delta$ 155.74, 105.67, 39.39

Figure S16

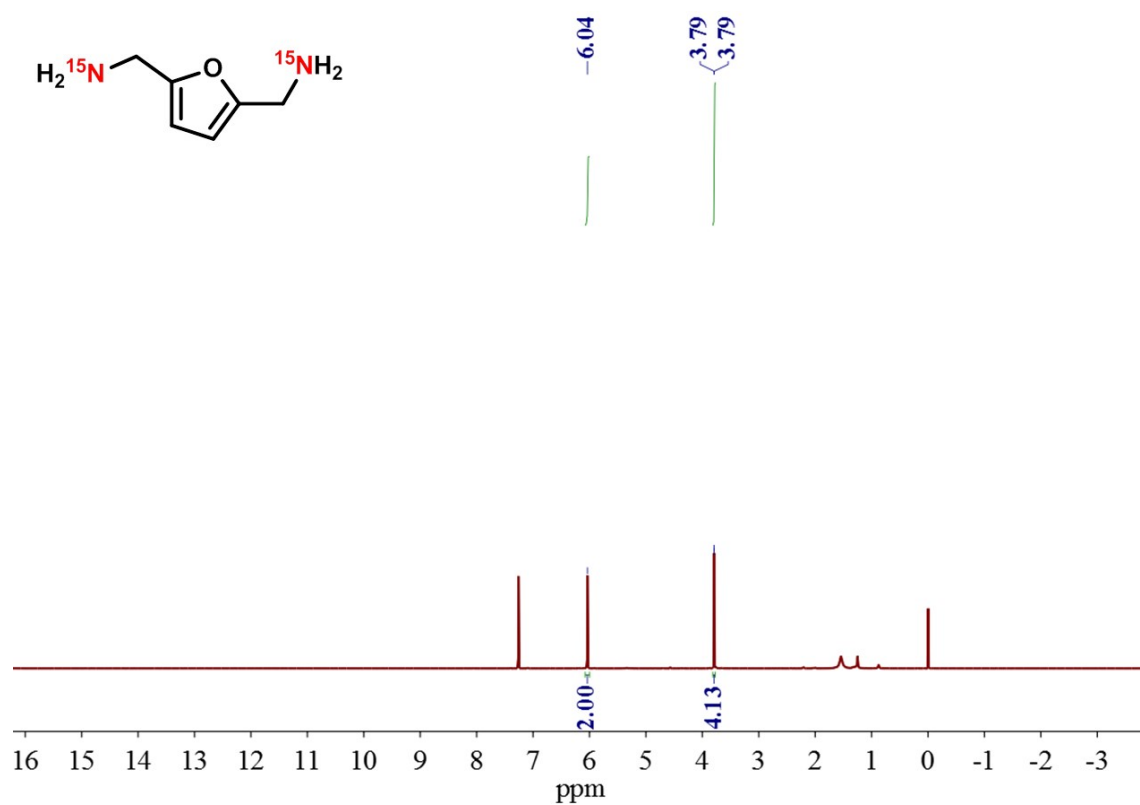

Figure S16. <sup>1</sup>H NMR spectrum (CDCl<sub>3</sub>-d<sub>7</sub>, 700 MHz) of isolated <sup>15</sup>N-substituted BAMF

(The <sup>15</sup>N-substituted BAMF was synthesised using <sup>15</sup>NH<sub>3</sub> as amination agent)

δ 6.04 (s, 2H, -C=CH-CH=C-), 3.79 (d, 4H, -CH<sub>2</sub>-N)

Figure S17

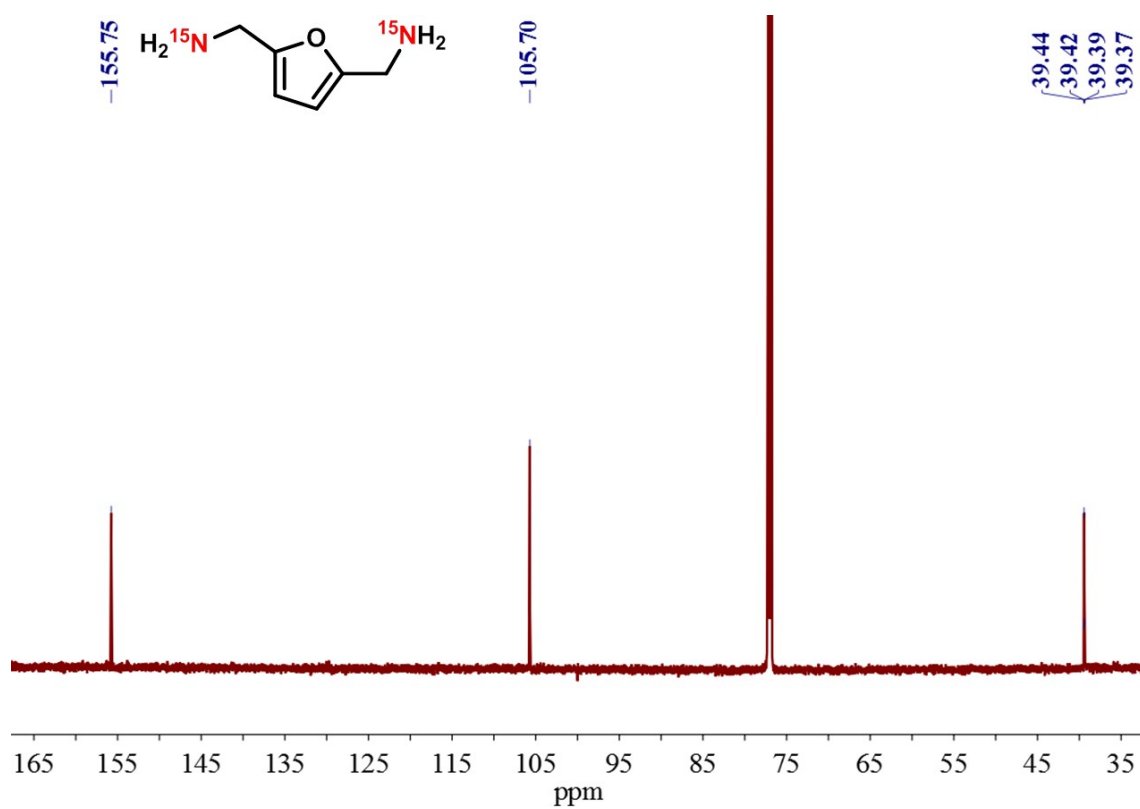

Figure S17. <sup>13</sup>C NMR spectrum (CDCl<sub>3</sub>-d, 176 MHz) of isolated <sup>15</sup>N-substituted BAMF  
(The <sup>15</sup>N-substituted BAMF was synthesised using <sup>15</sup>NH<sub>3</sub> as amination agent)  
δ155.74, 105.67, 39.39(q, -<sup>15</sup>N-C)

Figure S18

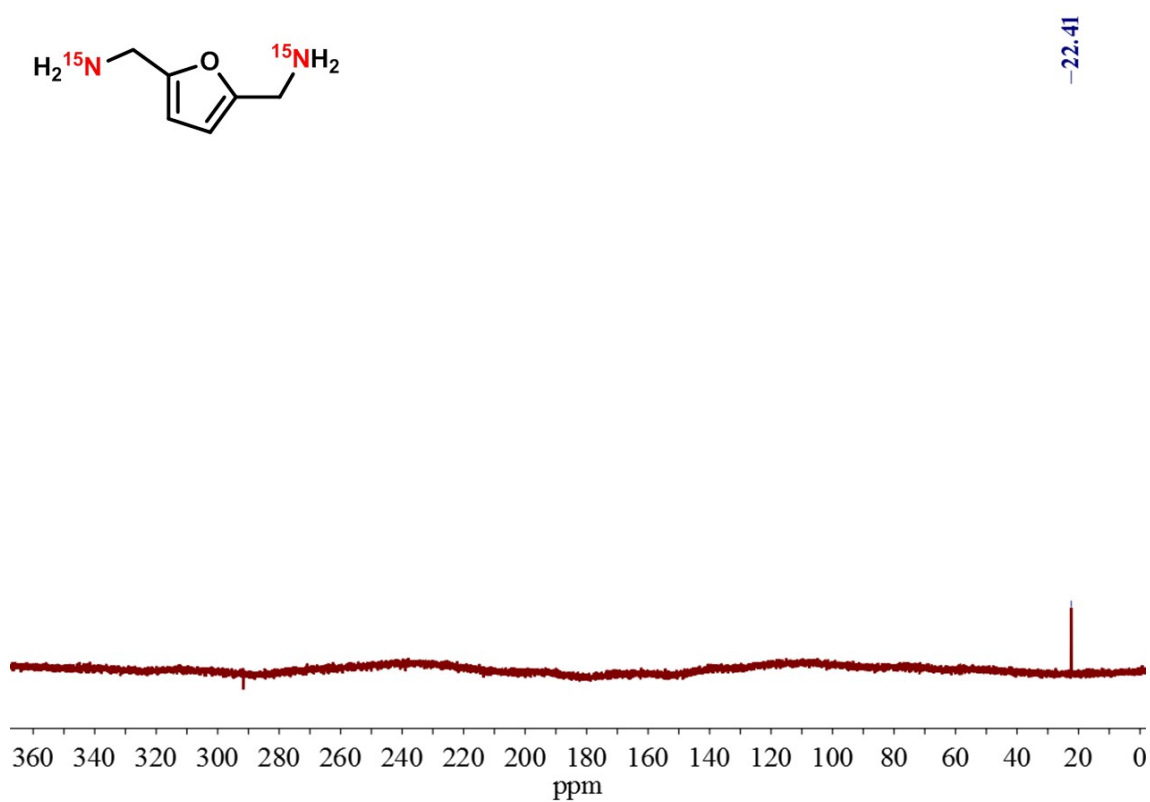

Figure S18.  $^{15}\text{N}$  NMR spectrum ( $\text{CDCl}_3\text{-}d$ , 71 MHz) of isolated  $^{15}\text{N}$ -substituted BAMF  
(The  $^{15}\text{N}$ -substituted BAMF was synthesised using  $^{15}\text{NH}_3$  as amination agent)

$\delta$ 22.41

Figure S19

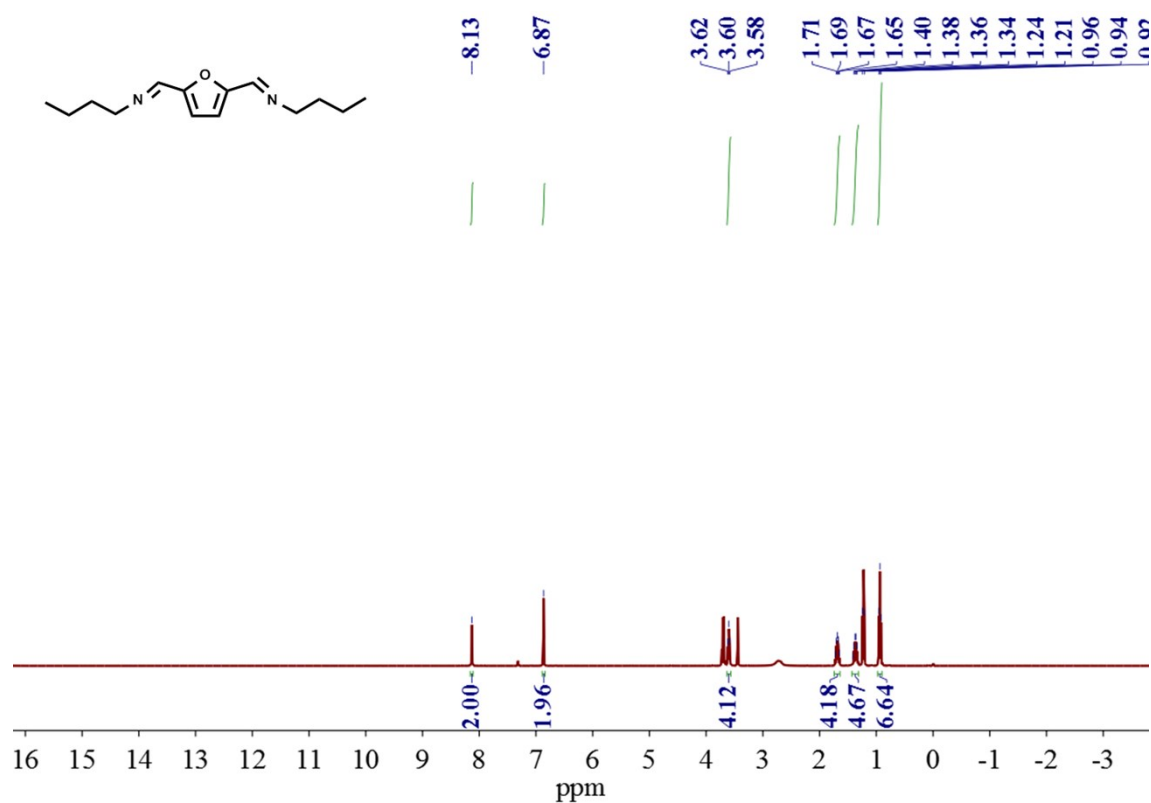

Figure S19.  $^1\text{H}$  NMR spectrum ( $\text{CDCl}_3$ - $d$ , 400 MHz) of isolated  $\text{N}_1, \text{N}_2$ -di-substituted imine (Schiff base 6a)  
 $\delta$  8.13 (s, 2H,  $-\text{CH}=\text{N}-$ ), 6.87 (s, 2H,  $-\text{C}=\text{CH}-\text{CH}=\text{C}-$ ), 3.60 (t,  $J = 7.6$  Hz, 4H,  $-\text{N}-\text{CH}_2-$ ), 1.69 (m, 4H,  $-\text{N}-\text{C}-\text{CH}_2-$ ), 1.38 (m, 4H,  $-\text{N}-\text{C}-\text{C}-\text{CH}_2-$ ), 0.94 (t,  $J = 7.5$  Hz, 6H,  $-\text{N}-\text{C}-\text{C}-\text{C}-\text{CH}_3$ )



Figure S20

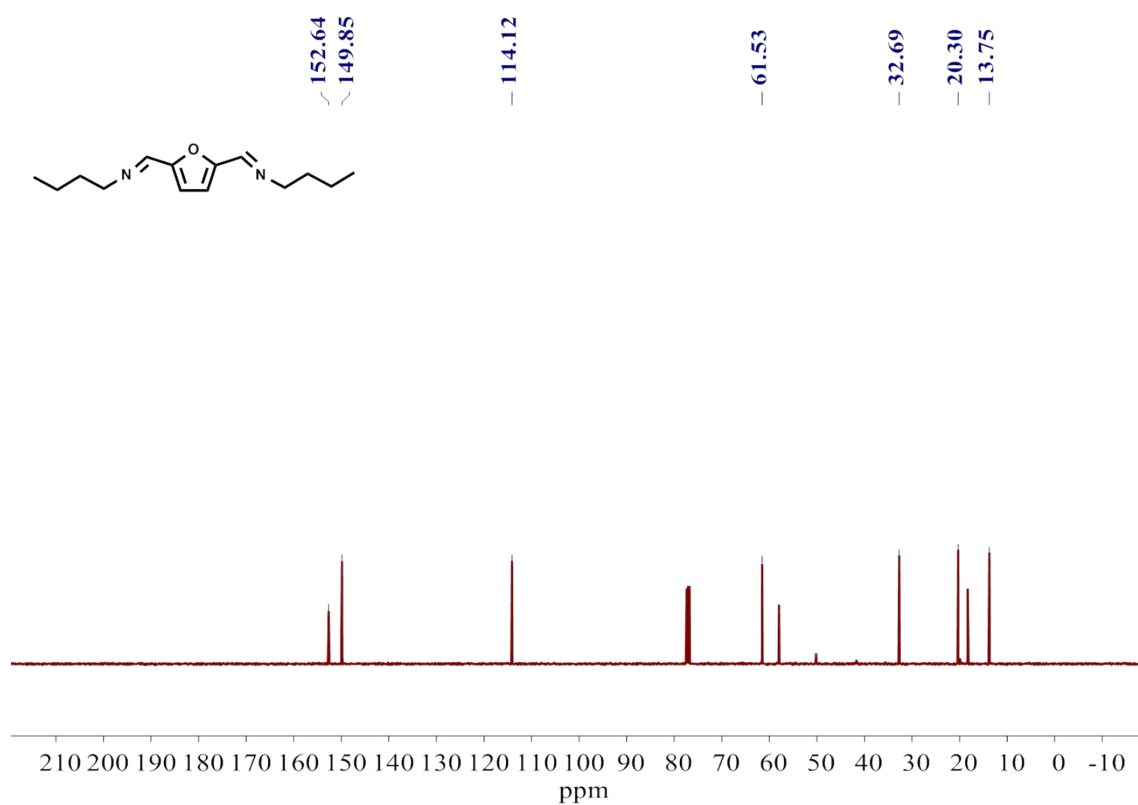

Figure S20. <sup>13</sup>C NMR spectrum (CDCl<sub>3</sub>-d, 101 MHz) of isolated N<sub>1</sub>,N<sub>2</sub>-di-substituted imine (Schiff base 6a)  
δ152.64, 149.85, 114.12, 61.53, 32.69, 20.30, 13.75

Figure S21

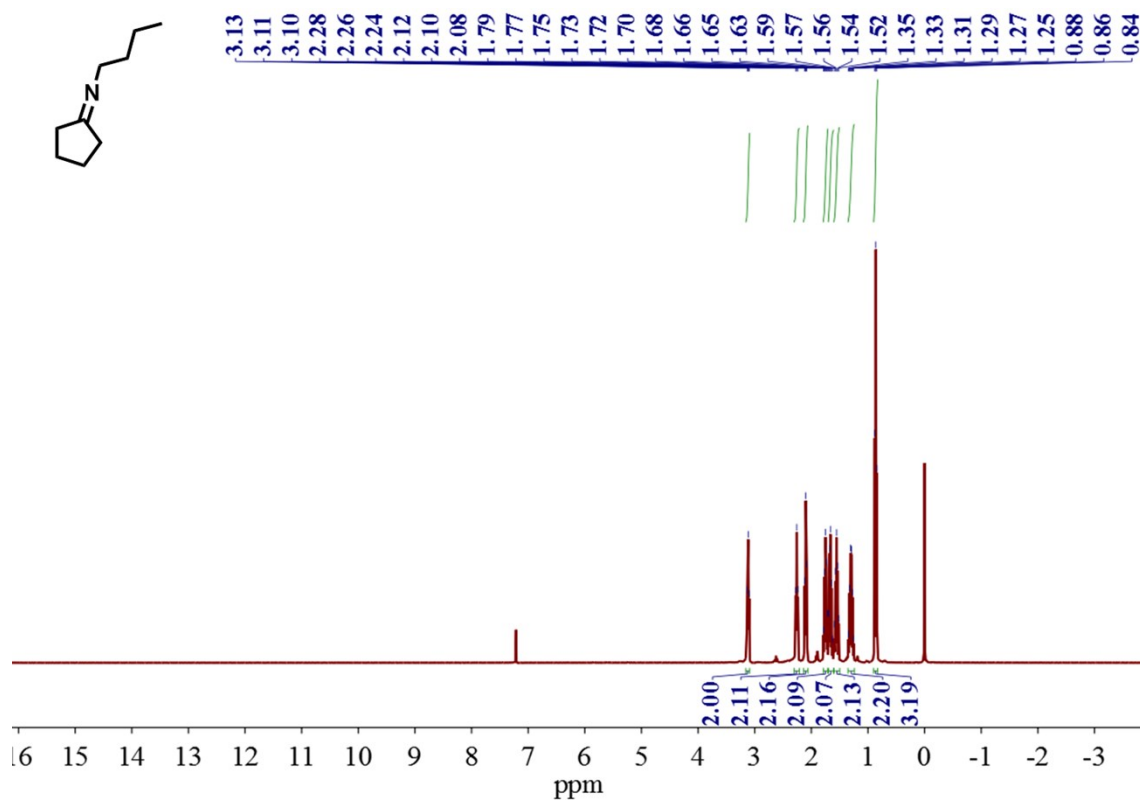

Figure S21.  $^1\text{H}$  NMR spectrum ( $\text{CDCl}_3$ -*d*, 400 MHz) of isolated butyl-substituted Schiff base derived from cyclopentanone

$\delta$  3.11 (t,  $J = 7.1$  Hz, 2H, =N-CH<sub>2</sub>-), 2.28 (t,  $J = 7.3$  Hz, 2H, -N=C-CH<sub>2</sub>-), 2.16 (t,  $J = 7.5$  Hz, 2H, -N=C-CH<sub>2</sub>-), 1.75 (m, 2H, -N=C-CH<sub>2</sub>-), 1.66 (m, 2H, -N=C-CH<sub>2</sub>-), 1.56 (m, 2H, =N-C-CH<sub>2</sub>-), 1.31 (m, 2H, =N-C-C-CH<sub>2</sub>-), 0.86 (t,  $J = 7.4$  Hz, 3H, =N-C-C-C-CH<sub>3</sub>)

Figure S22

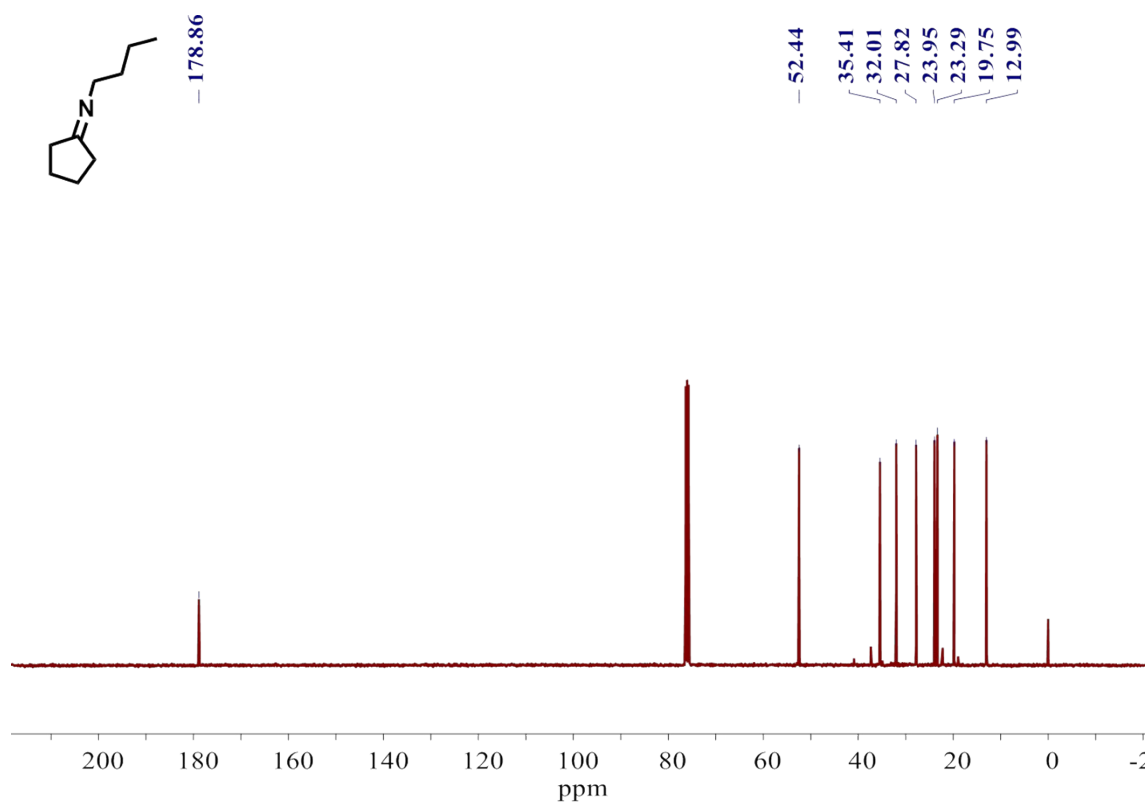

Figure S22.  $^{13}\text{C}$  NMR spectrum ( $\text{CDCl}_3$ -*d*, 101 MHz) of isolated butyl-substituted Schiff base derived from cyclopentanone

$\delta$ 178.86, 52.44, 35.41, 32.01, 27.82, 23.95, 23.29, 19.75, 12.99

## Reference

- S1. W. Li, X. Nie, X. Jiang, A. Zhang, F. Ding, M. Liu, Z. Liu, X. Guo and C. Song, *Applied Catalysis B: Environmental*, 2018, **220**, 397-408.
